# Supplementary material for: Sequence features of viral and human Internal Ribosome Entry Sites predictive of their activity
Source: PubMed Central journal article supplement (PMC5630158; doi:10.1371/journal.pcbi.1005734), 2017-09-18

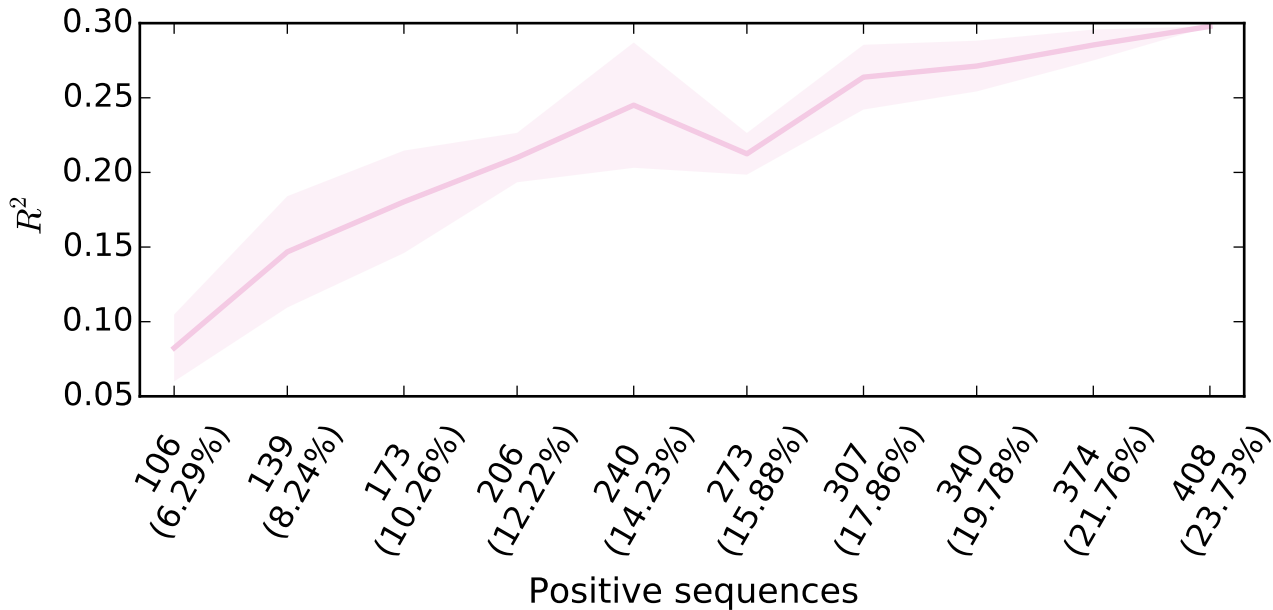

Supplement: pcbi.1005734.s007.pdf [file pcbi.1005734.s007.pdf]
